# Supplementary material
Source: Springer Nature journal article supplement (https://www.springermedizin.de/resource/supplementary/12998_2011_58_MOESM9_ESM.pdf/9680054)

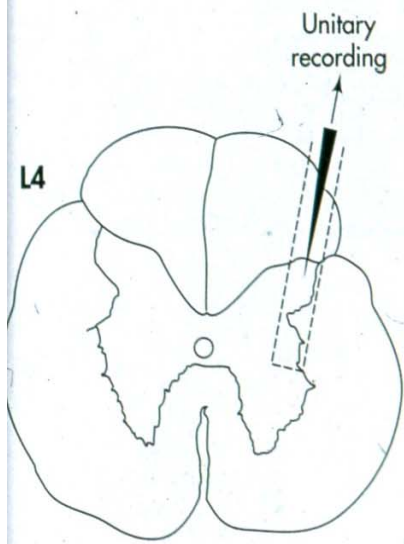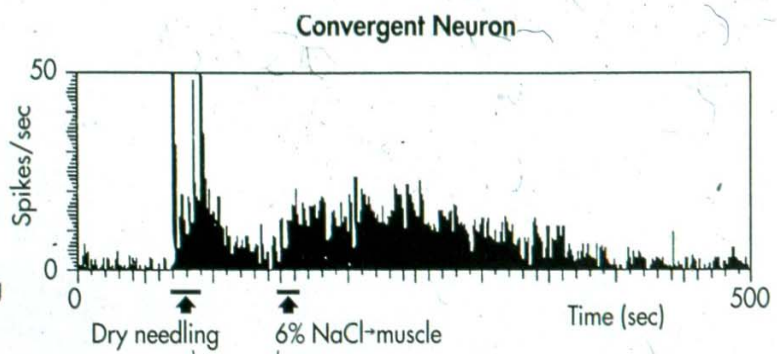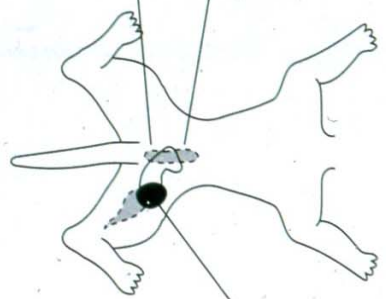

- Brush—press—pinch
- Skin pinch only
- Deep pinch

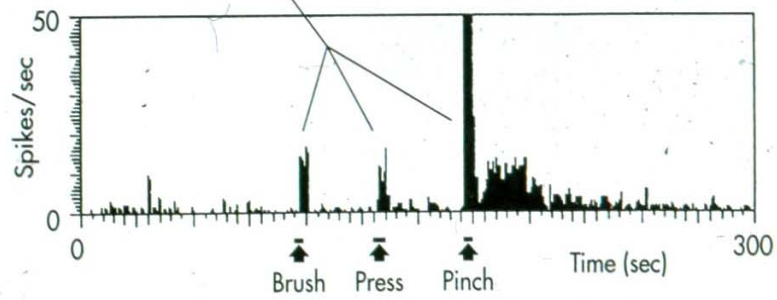

Supplement: MOESM9 [file 9680054]
